# Supplementary material for: A highly selective chromo-fluorogenic probe for specific detection of sarin gas simulant diethylchlorophosphate in liquid and vapor phases
Source: Royal Society of Chemistry journal article supplement (doi:10.1039/d4sd00169a), 2024-01-01
Supplement: d4sd00169a1.pdf [file d4sd00169a1.pdf]

*Supporting Information for*

**A Highly Selective Chromo-fluorogenic Probe for Specific Detection of Sarin Gas  
Simulant, Diethylchlorophosphate (DCP) in Liquid and Vapor Phase**

Tuhina Sultana<sup>1</sup>, Manas Mahato<sup>1</sup>, Sabbir Ahamed, Najmin Tohora, Jyoti Chourasia, Shreya

Ali and Sudhir Kumar Das\*

Department of Chemistry, University of North Bengal, Raja Rammohunpur, Darjeeling,  
West Bengal-734013, India

Corresponding author: (Dr. S. K. Das; E-mail: [sudhirkumardas@nbu.ac.in](mailto:sudhirkumardas@nbu.ac.in) )

<sup>1</sup>Equally contributed to this work

**S1: Materials and instrumentations**

All reagents used in the synthetic procedure are purchased from Sigma-Aldrich, India, and TCI, India, respectively. All organophosphates used in the present study are purchased from Sigma-Aldrich, India, and TCI, India. HPLC-grade solvents are used for synthesis and spectroscopic studies purpose. For nuclear magnetic resonance (NMR) spectral analysis, deuterated chloroform (CDCl<sub>3</sub>) is used and obtained from Sigma Aldrich-India. <sup>1</sup>H NMR and <sup>13</sup>C NMR spectra are recorded on a Bruker 400 MHz instrument at ambient conditions using tetramethylsilane (TMS) as a standard reference with chemical shifts (δ) in ppm unit. On an Agilent 6545XT AdvanceBio LC/Q-TOF spectrometer, high-resolution mass spectra (HRMS) have been performed. The UV-visible absorption spectrum study and photoluminescence experiments have been carried out on a HITACHI U-2910 and HITACHI F-7100 fluorimeter with 2.5 nm excitation and emission slit, respectively, under ambient environments. Excitation and emission wavelengths during the photoluminescence experiment are kept at 320 nm and 340-600 nm, respectively

**S2: Synthetic pathway of 2-(4-aminophenyl) benzoxazole (L)**

2-(4-aminophenyl) benzoxazole is prepared by following the literature procedure. A mixture of 2-aminophenol (1 g, 9.17 mmol) and polyphosphoric acid (PPA) (20 g) is refluxed

for 30 min at 120 °C, then added 4-aminobenzoic acid (1.3 g, 9.17 mmol) and again refluxed 4 hours at 120°C temperature, then poured the reaction mixture into an ice-cold water bath. The purified product was collected by column chromatography, and finally, the brownish solid of L was isolated (**Scheme S1**). Yield 85% <sup>1</sup>H NMR (400 MHz, DMSO-d<sub>6</sub>, 25 °C) δ (ppm): 6.01(s, 2H), 6.68 (d, 2H), 7.35 (d, 2H), 7.66 (d, 2H), and 7.85 (d, 2H).

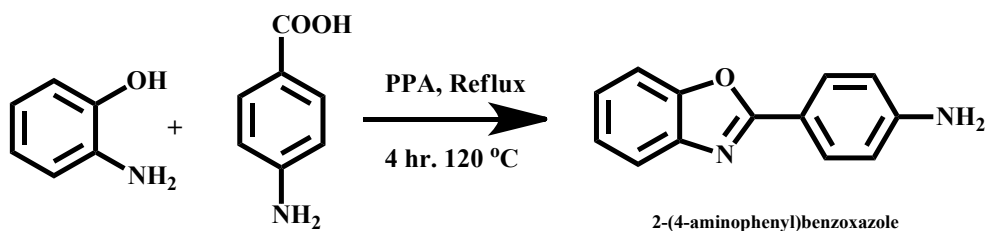

**Scheme S1** Synthetic route for preparing 2-(4-aminophenyl) benzoxazole.

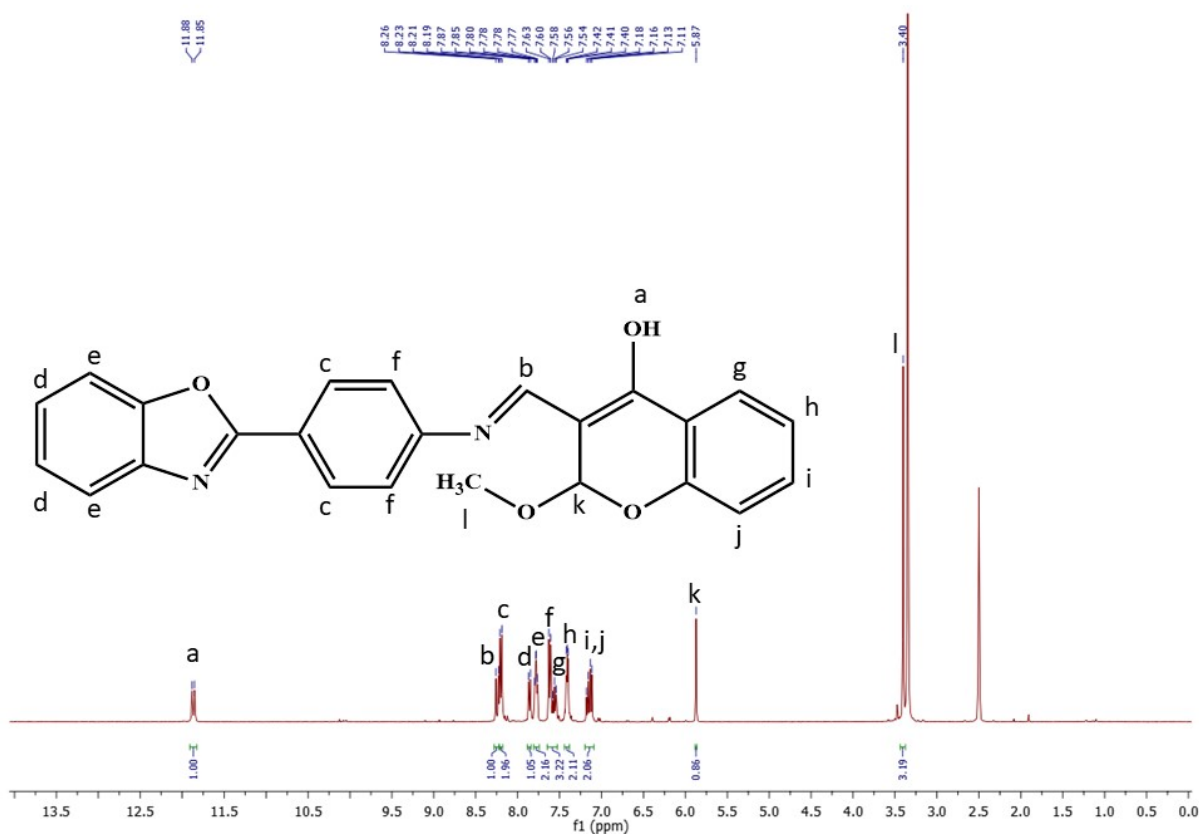

**Fig. S1** <sup>1</sup>H NMR spectra of our synthesized sensor **TSB** in DMSO-d<sub>6</sub>.

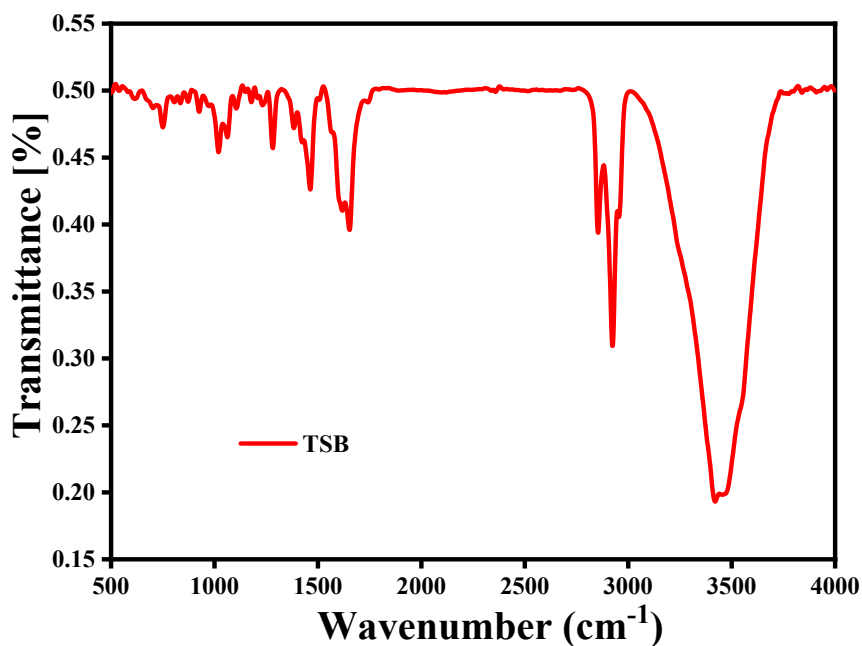

Fig. S2 IR spectra of our synthesized TSB.

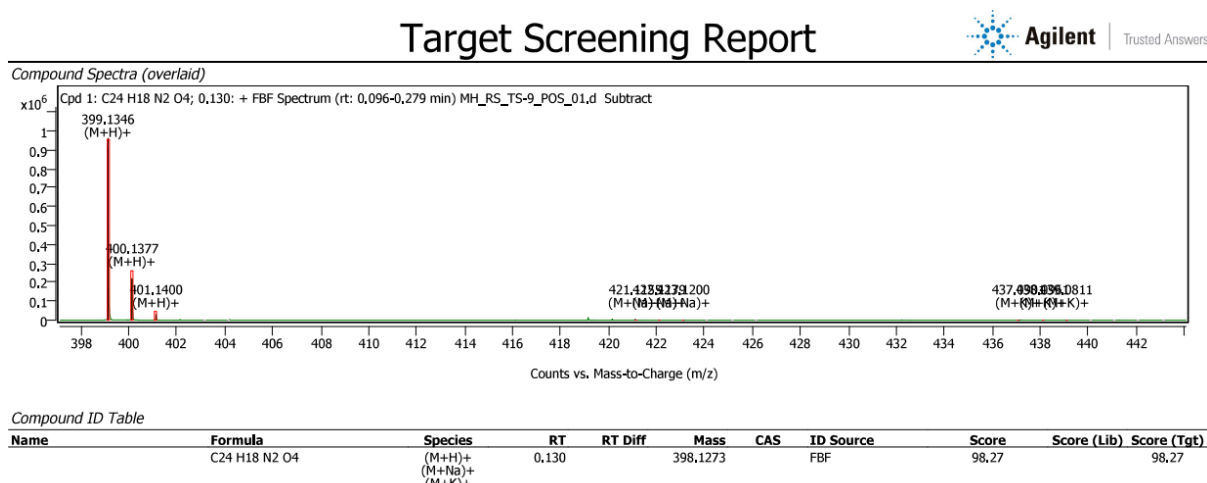

Fig. S3 HRMS spectra of our developed sensor TSB.

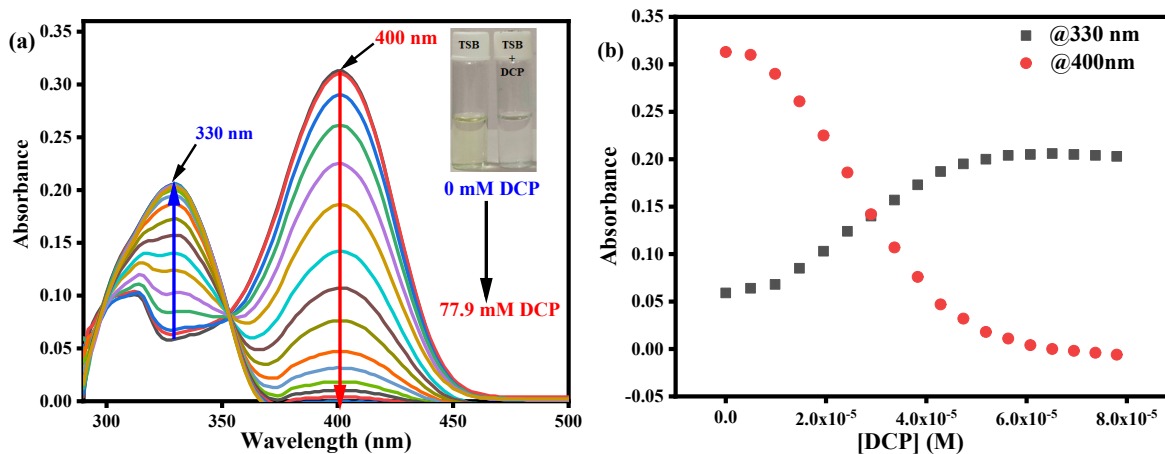

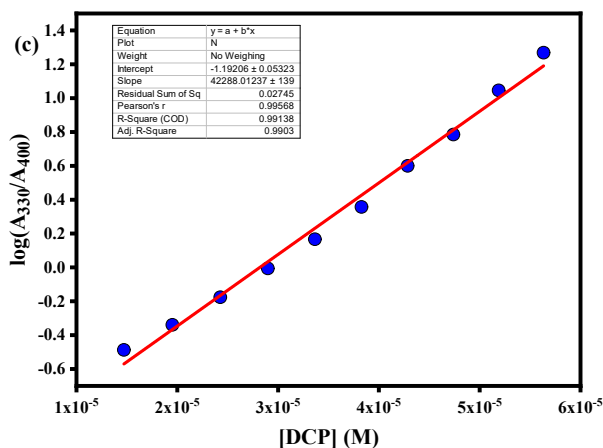

**Fig. S4** (a) UV-visible spectrophotometric spectra of TSB ( $5.97 \times 10^{-6}$  M) upon steady addition of DCP (0- 77.9 mM) in water-DMSO (50% v/v) medium and (b) the change of absorption behavior with increasing concentration of DCP at wavelengths 330 nm and 400 nm, respectively. (c) The ratiometric [DCP] vs.  $\log(A_{330}/A_{400})$  calibration curve for quantifying the unknown concentration of DCP with minimal experimental error.

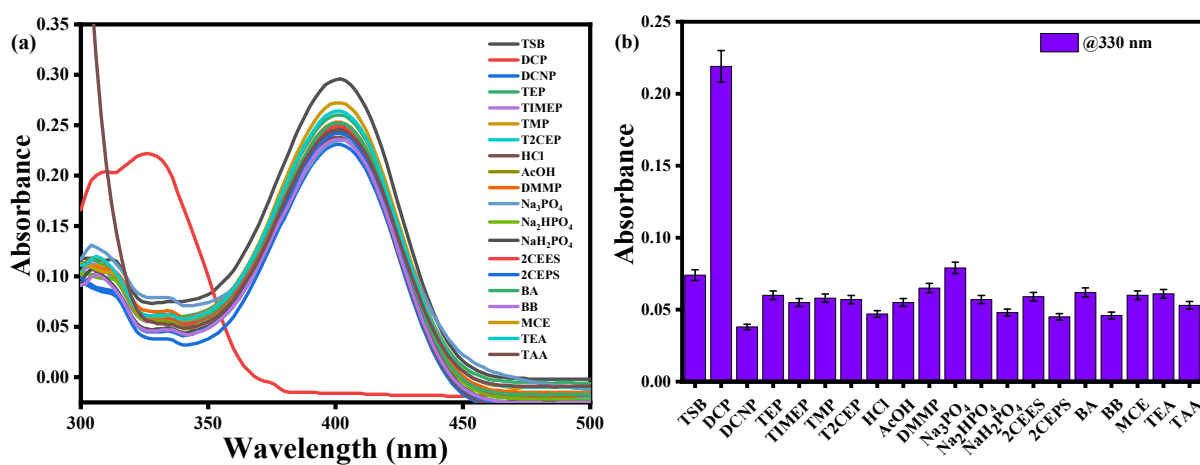

**Fig. S5** (a) Selectivity spectrum profile of sensor TSB with various target analytes in 50% (v/v) water-DMSO mixture (b) corresponding selectivity bar diagram at 330 nm wavelength.

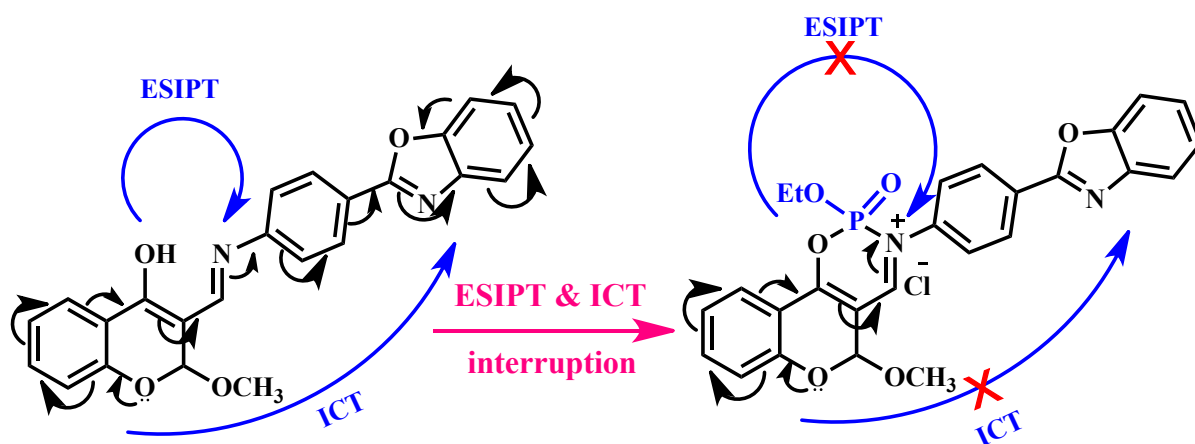

**Scheme S2** Suppression of ICT and ESIPT processes due to the formation of phosphorylated TSB-DCP product.

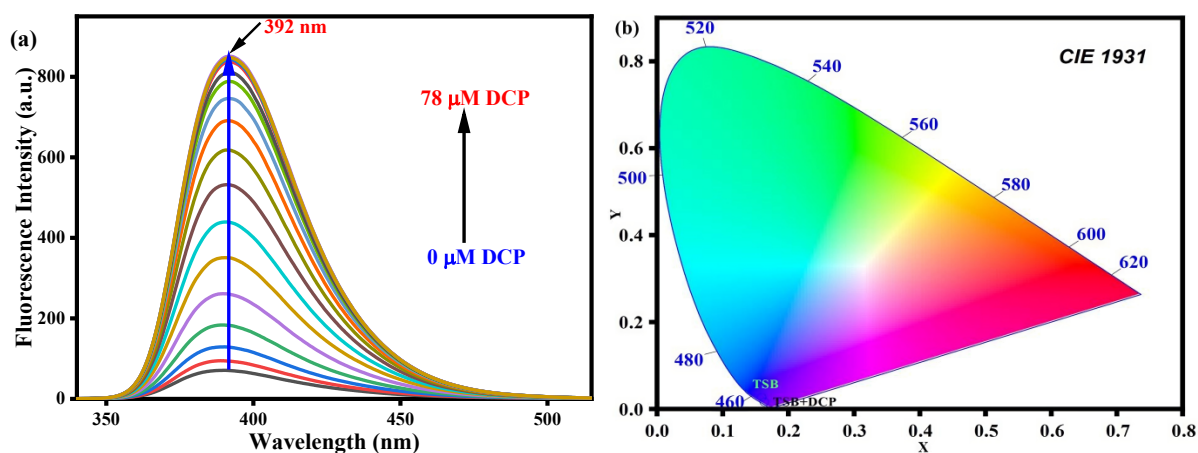

**Fig. S6 (a)** Emission titration of probe TSB solution by gradual addition of toxic analyte DCP (0 to 78  $\mu\text{M}$ ) in 50 % (v/v) water-DMSO medium. **(b)** Corresponding CIE diagram demonstrating its fluorogenic color.

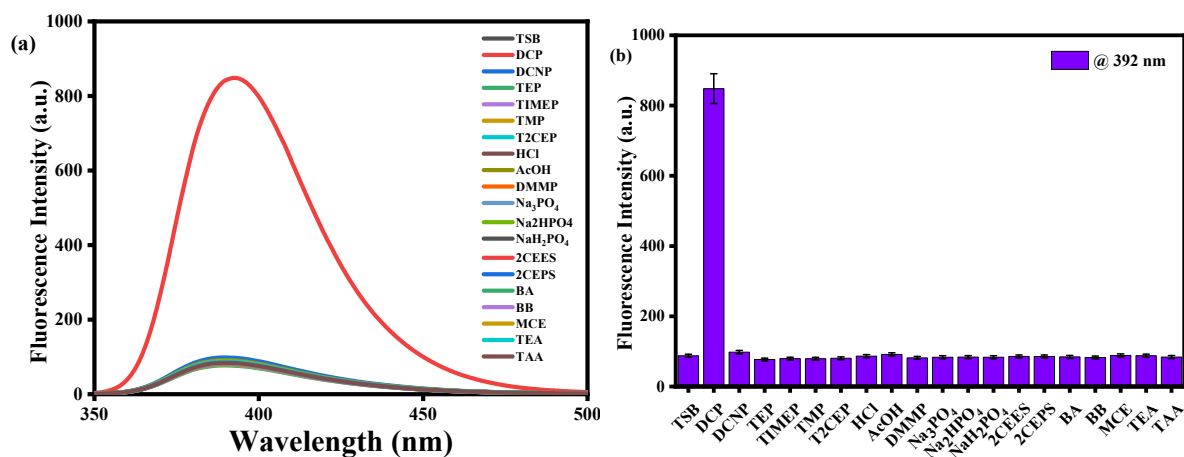

**Fig. S7 (a)** Selectivity emission spectra of our developed sensor **TSB** with various toxic analytes in 50 % (v/v) water-DMSO medium. **(b)** Corresponding selectivity bar diagram at 390 nm.

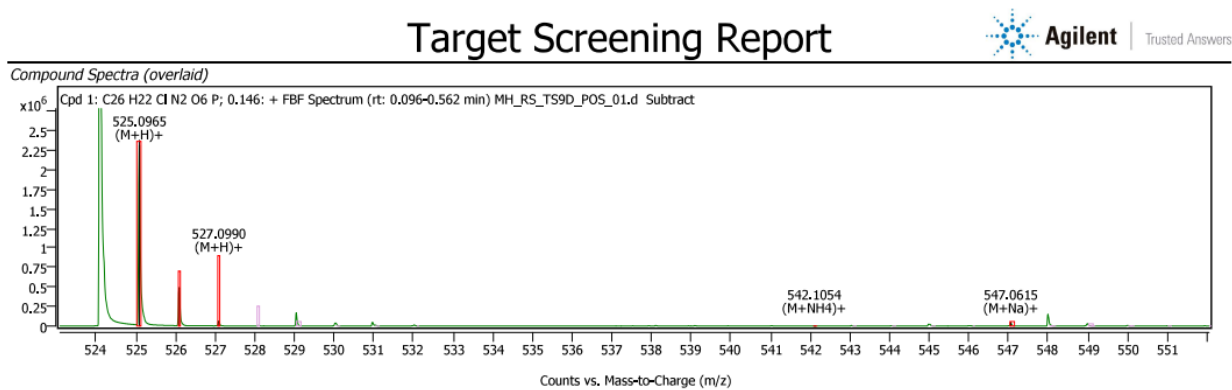

**Fig. S8** High-resolution mass spectra of the **TSB-DCP** phosphorylated product.

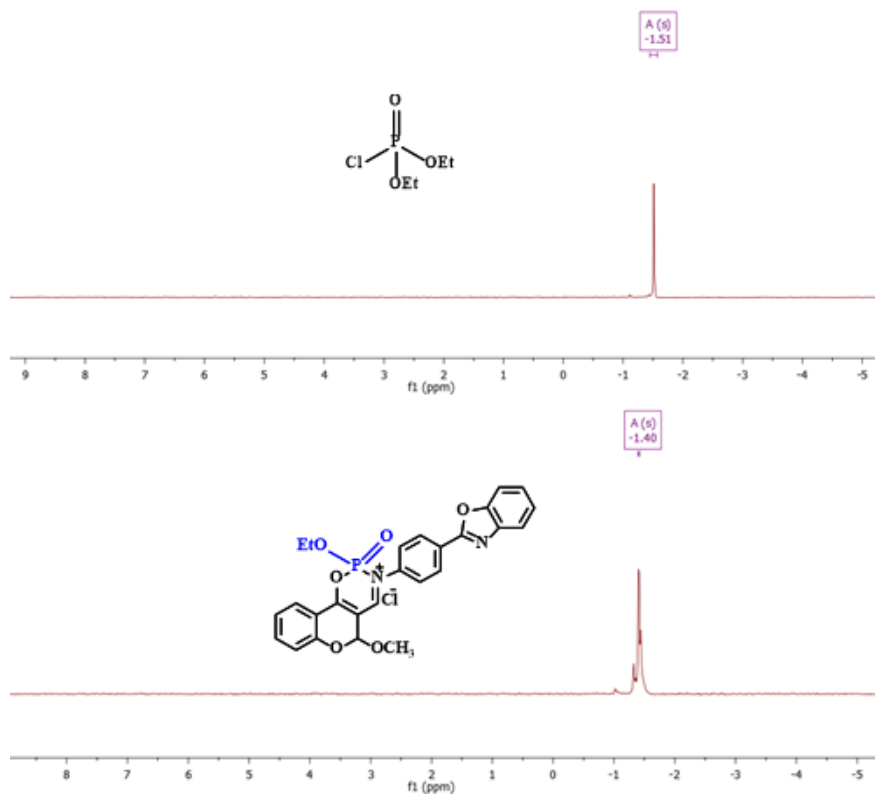

**Fig. S9**  $^31\text{P}$  NMR spectra of **DCP** and **PB-DCP** in pure  $\text{DMSO-}d_6$ .

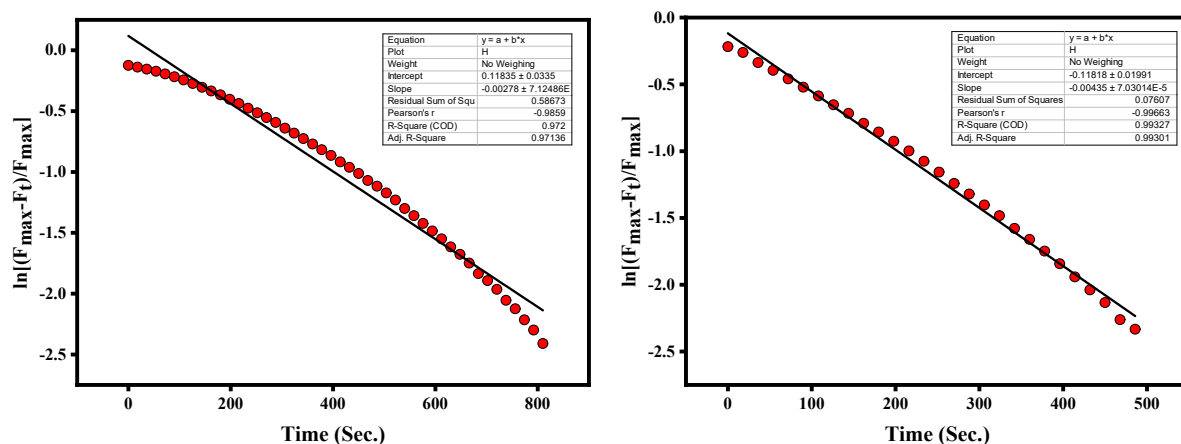

**Fig. S10** Pseudo first-order rate constant plot of TSB in the presence of DCP in DMSO (left) and 50 % (v/v) water mixture (right).

**Table S1:** Comparison table of various chemosensors that have been introduced for the detection of DCP in the last few decades with our TSB.

| Fluorophore used                             | Type of response                                      | Response Time (min or Sec) | Test kit                     | Detection limit                                                   | Detection in gaseous phase | Ref.     |
|----------------------------------------------|-------------------------------------------------------|----------------------------|------------------------------|-------------------------------------------------------------------|----------------------------|----------|
| No fluorophore<br>Benzoxazole-chromone based | Colorimetric (ratiometric),<br>fluorometric (turn on) | Within few minutes         | vapor test<br>Paper test     | 0.64 $\mu\text{M}$ (DMSO)<br>& 0.36 $\mu\text{M}$ (Water mixture) | Yes                        | Our work |
| No fluorophore                               | Fluorometric (turn-off)                               | Almost 2 minutes           | Yes (Spot Testing Device)    | 0.023 and 0.092 mM                                                | Yes                        | 1        |
| fluorescein-hydroxamate aldehyde             | Chromogenic                                           | Few minutes                | Not mentioned                | 3 mM                                                              | Not mentioned              | 2        |
| pyridine acceptor moiety                     | Colorimetric                                          | Not mentioned              | Polyurethane film vapor test | 0.9 mM                                                            | Yes                        | 3        |

|                                                  |                                      |                  |                          |                             |     |    |
|--------------------------------------------------|--------------------------------------|------------------|--------------------------|-----------------------------|-----|----|
| DASA-Derived Polymeric Probe                     | Colorimetric (on-off)                | Within 2 minutes | vapor test               | 1 mM                        | Yes | 4  |
| Benzothiazole                                    | Fluorometric (ratiometric)           | Few minutes      | vapor test               | 1.6 $\mu$ M                 | Yes | 5  |
| bis-indolyl-based chromogenic probe              | Colorimetric                         | Few minutes      | vapor test<br>Paper test | 10.8 $\mu$ M                | Yes | 6  |
| pyrene-based turn-on fluorescent polymeric probe | ON/OFF reversible fluorescence       | Few minutes      | Quartz Plate vapour test | 0.1 mM                      | Yes | 7  |
| Xanthene                                         | Colorimetric, fluorometric (turn on) | Not mentioned    | Not mentioned            | 1.36 $\mu$ M and 26 $\mu$ M | NA  | 8  |
| thiourea-based rhodamine                         | Colorimetric fluorometric            | Not available    | No                       | 2 $\mu$ M                   | No  | 9  |
| Polymer (BPAm-co-DMA-co-MPDEA)                   | colorimetric                         | Within few mins  | polymeric film           | 18.4 $\mu$ M                | Yes | 10 |

## Reference

- 1 N. Singh, K. Kumar, N. Srivastav, R. Singh, V. Kaur, J. P. Jasinski and R. J. Butcher, *New J. Chem.*, 2018, **42**, 8756–8764.
- 2 D. R. Goud, D. Pardasani, V. Tak and D. K. Dubey, *RSC Adv.*, 2014, **4**, 24645–24648.
- 3 S. Royo, A. M. Costero, M. Parra, S. Gil, R. Martínez-Máñez and F. Sancenõn, *Chemistry*, 2011, **17**, 6931–6934.
- 4 A. Balamurugan and H. Il Lee, *Macromolecules*, 2016, **49**, 2568–2574.
- 5 A. Manna, K. Jana, N. Guchhait and S. Goswami, *New J. Chem.*, 2017, **41**, 6661–6666.



- 6 N. Dey, S. Jha and S. Bhattacharya, *Analyst*, 2018, **143**, 528–535.
- 7 M. Gupta and H. Il Lee, *Macromolecules*, 2017, **50**, 6888–6895.
- 8 K. C. Behera and B. Bag, *Chem. Commun.*, 2020, **56**, 9308–9311.
- 9 S. Li, Y. Zheng, W. Chen, M. Zheng, H. Zheng, Z. Zhang, Y. Cui, J. Zhong and C. Zhao, *Mol. 2019, Vol. 24, Page 827*, 2019, **24**, 827.
- 10 T. N. Annisa, S. H. Jung, M. Gupta, J. Y. Bae, J. M. Park and H. Il Lee, *ACS Appl. Mater. Interfaces*, 2020, **12**, 11055–11062.
